# Supplementary material for: CAERUS: Predicting CAncER oUtcomeS Using Relationship between Protein Structural Information, Protein Networks, Gene Expression Data, and Mutation Data
Source: PLoS Comput Biol. 2011 Mar 31;7(3):e1001114. doi: 10.1371/journal.pcbi.1001114 (PMC3068924; doi:10.1371/journal.pcbi.1001114)
Supplement: Table S1 — A list of 222 over-represented GO terms associated with identified gene signatures. (0.09 MB XLS) [file pcbi.1001114.s003.xls]

## Sheet: Sheet1
GO_id	GO_term	Number_gene	Adjusted_pvalue	Gene_list
GO:0005515	protein binding	150	1.78501e-33	ABL1 ABL1 ABL2 ACTA1 ACTB ADH5 AKT1 ATF2 ATF3 ATF4 ATF7 ATP5A1 ATP5B BACH1 BATF BCL6 BLK BRAF BTK BTRC CALM1 CCNC CCND1 CCND2 CCND3 CCNE1 CD2AP CDC16 CDC2 CDC42 CDK2 CDK3 CDK4 CDK6 CEBPB CEBPG CRK CRKL CSE1L CSK CTBP1 DBP DDIT3 DPP4 EEF1A1 EEF1B2 EEF1G EEF2 EIF4A1 EIF4A2 FOS FOSL1 FOSL2 FYN GART GRAP2 GRB2 GSK3B GSTM3 HCK HLF HRAS ITK JAK2 JUN JUNB JUND KPNA2 KPNA4 KPNA6 KPNB1 LCK LCP2 LSM2 LSM3 …
GO:0005829	cytosol	55	1.30072e-26	ACTB AKT1 ATF2 BTRC CALM1 CCND1 CCNE1 CDC16 CDC2 CDC42 CDK2 CDK4 CRK EEF1A1 EEF1B2 EEF1G EIF4A1 EIF4A2 FYN GART GRAP2 GRB2 GSK3B ITK JUN KPNB1 LCK LCP2 MAP2K1 MAPK1 MAPK14 MAPK3 NFKB2 ODC1 PAK2 PIK3R1 PIK3R2 PLCG1 PSMB1 PSMB2 PSMB3 PSMB6 PSMB7 PSMC4 PTPN6 RAC1 RALGDS RAN RAP1A SEC23A SHC1 SNRPD3 SOS1 SRC ZAP70
GO:0006468	protein amino acid phosphorylation	34	2.91204e-26	ABL1 ABL2 AKT1 BLK BRAF BTK CDC2 CDK2 CDK3 CDK4 CDK6 CSK CTBP1 FYN GSK3B HCK ITK JAK2 LCK LYN MAP2K1 MAPK1 MAKP14 MAPK3 PAK1 PAK2 PIK3CD PRKCE PRKCZ SRC SYK TEC TGFBR1 ZAP70
GO:0007242	intracellular signaling cascade	55	1.8228e-25	ABL1 ABL1 AKT1 BLK BRAF BTK CCND1 CCNE1 CDC42 CRK CRKL DDIT3 FYN GRAP2 GRB2 GSK3B HRAS ITK JAK2 LYN MAP2K1 MAPK1 MAPK14 MAPK3 MSH2 MSH6 NRAS PAK1 PCNA PIK3CD PIK3CG PIK3R1 PLCG1 PLCG2 PRKCE PRKCZ RAB5A RAC1 RALA RALGDS RAN RAP1A RAP2A RASA1 RFC4 RRAS SHC1 SOS1 SRC SYK TEC TIAM1 VAV1 VAV2 VAV3 ZAP70
GO:0032553	ribonucleotide binding	69	4.30725e-25	ABL1 ABL1 ABL2 ACTA1 ACTB AKT1 ATP5A1 ATP5B BLK BRAF BTK CDC2 CDC42 CDK2 CDK3 CDK4 CDK6 CSK DDX18 DDX24 EEF1A1 EEF2 EIF4A1 EIF4A2 FYN GART GSK3B HCK HRAS ITK JAK2 LCK LYN MAP2K1 MAPK1 MAPK14 MAPK3 MAT1A MSH3 MSH4 MVK NRAS PAK1 PAK2 PC PIK3CD PIK3CG PRKCE PRKCZ PSMC4 RAB5A RAC1 RALA RAN RAP1A RAP2A RFC2 RFC4 RFC5 RRAS SMARCA4 SRC SRP54 SYK TEC TGFBR1 TUBG1 UBE2D2 XRCC5 ZAP70
GO:0032555	purine ribonucleotide binding	69	4.30725e-25	ABL1 ABL1 ABL2 ACTA1 ACTB AKT1 ATP5A1 ATP5B BLK BRAF BTK CDC2 CDC42 CDK2 CDK3 CDK4 CDK6 CSK DDX18 DDX24 EEF1A1 EEF2 EIF4A1 EIF4A2 FYN GART GSK3B HCK HRAS ITK JAK2 LCK LYN MAP2K1 MAPK1 MAPK14 MAPK3 MAT1A MSH3 MSH4 MVK NRAS PAK1 PAK2 PC PIK3CD PIK3CG PRKCE PRKCZ PSMC4 RAB5A RAC1 RALA RAN RAP1A RAP2A RFC2 RFC4 RFC5 RRAS SMARCA4 SRC SRP54 SYK TEC TGFBR1 TUBG1 UBE2D2 XRCC5 ZAP70
GO:0017076	purine nucleotide binding	69	5.25133e-24	ABL1 ABL1 ABL2 ACTA1 ACTB AKT1 ATP5A1 ATP5B BLK BRAF BTK CDC2 CDC42 CDK2 CDK3 CDK4 CDK6 CSK DDX18 DDX24 EEF1A1 EEF2 EIF4A1 EIF4A2 FYN GART GSK3B HCK HRAS ITK JAK2 LCK LYN MAP2K1 MAPK1 MAPK14 MAPK3 MAT1A MSH3 MSH4 MVK NRAS PAK1 PAK2 PC PIK3CD PIK3CG PRKCE PRKCZ PSMC4 RAB5A RAC1 RALA RAN RAP1A RAP2A RFC2 RFC4 RFC5 RRAS SMARCA4 SRC SRP54 SYK TEC TGFBR1 TUBG1 UBE2D2 XRCC5 ZAP70
GO:0000166	nucleotide binding	71	3.5847e-22	ABL1 ABL1 ABL2 ACTA1 ACTB AKT1 ATP5A1 ATP5B BLK BRAF BTK CDC2 CDC42 CDK2 CDK3 CDK4 CDK6 CSK DDX18 DDX24 EEF1A1 EEF2 EIF4A1 EIF4A2 FYN GART GSK3B HCK HRAS ITK JAK2 LCK LYN MAP2K1 MAPK1 MAPK14 MAPK3 MAT1A MSH2 MSH3 MSH4 MSH6 MVK NRAS PAK1 PAK2 PC PIK3CD PIK3CG PRKCE PRKCZ PSMC4 RAB5A RAC1 RALA RAN RAP1A RAP2A RFC2 RFC4 RFC5 RRAS SMARCA4 SRC SRP54 SYK TEC TGFBR1 TUBG1 UBE2D2 XRCC5 ZAP70
GO:0016772	transferase activity, transferring phosphorus-containing groups	46	1.16619e-21	ABL1 ABL1 ABL2 AKT1 BLK BRAF BTK CCND1 CDC2 CDK2 CDK3 CDK4 CDK6 CRKL CSK FYN GSK3B HCK ITK JAK2 LCK LYN MAP2K1 MAPK1 MAPK14 MAPK3 MVK PAK1 PAK2 PIK3CD PIK3CG POLR2A POLR2B POLR2C POLR2F POLR2H POLR2J POLR2K POLR2L PRKCE PRKCZ SRC SYK TEC TGFBR1 ZAP70 ZNRD1
GO:0004715	non-membrane spanning protein tyrosine kinase activity	15	4.00844e-21	ABL1 ABL1 ABL2 BLK BTK CSK FYN HCK ITK JAK2 LCK LYN SRC SYK TEC ZAP70
GO:0016310	phosphorylation	40	5.04171e-21	ABL1 ABL1 ABL2 AKT1 BLK BRAF BTK CDC2 CDK2 CDK3 CDK4 CDK6 CSK CTBP1 FYN GSK3B HCK ITK JAK2 LCK LYN MAP2K1 MAPK1 MAPK14 MAPK3 MSH2 MVK PAK1 PAK2 PIK3CD PIK3CG PIK3R1 PRKCE PRKCZ SHC1 SRC SYK TEC TGFBR1 UQCRC1 ZAP70
GO:0009987	cellular process	160	6.31893e-20	ABL1 ABL1 ABL2 ACTA1 ACTB ADH5 AKT1 ATF2 ATF4 ATF7 ATP5A1 ATP5B BATF BCL6 BLK BRAF BTK BTRC CALM1 CCNC CCND1 CCND2 CCND3 CCNE1 CD2AP CDC16 CDC2 CDC42 CDK2 CDK3 CDK4 CDK6 CEBPB CEBPG CRK CRKL CSE1L CSK CTBP1 DBP DDIT3 DDX24 DPP4 EEF1A1 EEF1B2 EEF1G EEF2 EIF4A1 EIF4A2 ENO2 FOS FOSL1 FOSL2 FYN GART GDI2 GRAP2 GRB2 GSK3B GSTM3 HCK HLF HRAS ITK JAK2 JUN JUNB JUND KPNA2 KPNB1 LCK LCP2 LSM2 LSM3 LSM6 LY…
GO:0005524	ATP binding	55	2.03858e-19	ABL1 ABL1 ABL2 ACTA1 ACTB AKT1 ATP5A1 ATP5B BLK BRAF BTK CDC2 CDK2 CDK3 CDK4 CDK6 CSK DDX18 DDX24 EIF4A1 EIF4A2 FYN GART GSK3B HCK ITK JAK2 LCK LYN MAP2K1 MAPK1 MAPK14 MAPK3 MAT1A MSH3 MSH4 MVK PAK1 PAK2 PC PIK3CD PIK3CG PRKCE PRKCZ PSMC4 RFC2 RFC4 RFC5 SMARCA4 SRC SYK TEC TGFBR1 UBE2D2 XRCC5 ZAP70
GO:0006793	phosphorus metabolic process	42	3.06405e-19	ABL1 ABL1 ABL2 AKT1 BLK BRAF BTK CDC2 CDK2 CDK3 CDK4 CDK6 CSK CTBP1 FYN GSK3B HCK ITK JAK2 LCK LYN MAP2K1 MAPK1 MAPK14 MAPK3 MSH2 MVK PAK1 PAK2 PIK3CD PIK3CG PIK3R1 PPP5C PRKCE PRKCZ PTPN6 SHC1 SRC SYK TEC TGFBR1 UQCRC1 ZAP70
GO:0006796	phosphate metabolic process	42	3.06405e-19	ABL1 ABL1 ABL2 AKT1 BLK BRAF BTK CDC2 CDK2 CDK3 CDK4 CDK6 CSK CTBP1 FYN GSK3B HCK ITK JAK2 LCK LYN MAP2K1 MAPK1 MAPK14 MAPK3 MSH2 MVK PAK1 PAK2 PIK3CD PIK3CG PIK3R1 PPP5C PRKCE PRKCZ PTPN6 SHC1 SRC SYK TEC TGFBR1 UQCRC1 ZAP70
GO:0032559	adenyl ribonucleotide binding	55	3.41475e-19	ABL1 ABL1 ABL2 ACTA1 ACTB AKT1 ATP5A1 ATP5B BLK BRAF BTK CDC2 CDK2 CDK3 CDK4 CDK6 CSK DDX18 DDX24 EIF4A1 EIF4A2 FYN GART GSK3B HCK ITK JAK2 LCK LYN MAP2K1 MAPK1 MAPK14 MAPK3 MAT1A MSH3 MSH4 MVK PAK1 PAK2 PC PIK3CD PIK3CG PRKCE PRKCZ PSMC4 RFC2 RFC4 RFC5 SMARCA4 SRC SYK TEC TGFBR1 UBE2D2 XRCC5 ZAP70
GO:0006468	protein amino acid phosphorylation	37	3.58095e-19	ABL1 ABL1 ABL2 AKT1 BLK BRAF BTK CDC2 CDK2 CDK3 CDK4 CDK6 CSK CTBP1 FYN GSK3B HCK ITK JAK2 LCK LYN MAP2K1 MAPK1 MAPK14 MAPK3 PAK1 PAK2 PIK3CD PIK3CG PIK3R1 PRKCE PRKCZ SHC1 SRC SYK TEC TGFBR1 ZAP70
GO:0044424	intracellular part	154	1.2536e-18	ABL1 ABL1 ABL2 ACTA1 ACTB ADH5 AKT1 ATF2 ATF3 ATF4 ATF7 ATP5A1 ATP5B BATF BCL6 BRAF BTK BTRC CALM1 CCNC CCND1 CCND2 CCND3 CCNE1 CD2AP CDC16 CDC2 CDC42 CDK2 CDK3 CDK4 CDK6 CEBPB CEBPG CRK CRKL CSE1L CSK CTBP1 CTBP2 DBP DDIT3 DDX24 EEF1A1 EEF1B2 EEF1G EEF2 EIF4A1 EIF4A2 ENO2 FOS FOSL1 FOSL2 FYN GART GDI2 GRAP2 GRB2 GSK3B GSTM3 HCK HLF HRAS ITK JAK2 JUN JUNB JUND KPNA2 KPNA4 KPNA6 KPNB1 LCK LCP2 LSM…
GO:0043234	protein complex	61	2.06839e-18	ACTB ATF4 ATP5A1 ATP5B CCND1 CCND2 CCND3 CD2AP CDK2 CDK4 CDK6 CSE1L EEF1A1 EEF1B2 EEF1G EIF4A1 EIF4A2 ENO2 FOS GSK3B JUN KPNA2 KPNA4 KPNA6 KPNB1 MSH2 MSH3 MSH6 NFKB2 PCNA PIK3CD PIK3CG PIK3R1 PIK3R2 POLR2A POLR2B POLR2F POLR2J POLR2L PSMB1 PSMB2 PSMB3 PSMB6 PSMB7 PSMC4 RAN RAP1A RFC2 RFC4 RFC5 SEC23A SEC23B SHC1 SMARCA4 SNAP25 SYK TGFBR1 TUBG1 XRCC5 YY1 ZAP70
GO:0030554	adenyl nucleotide binding	55	3.48742e-18	ABL1 ABL1 ABL2 ACTA1 ACTB AKT1 ATP5A1 ATP5B BLK BRAF BTK CDC2 CDK2 CDK3 CDK4 CDK6 CSK DDX18 DDX24 EIF4A1 EIF4A2 FYN GART GSK3B HCK ITK JAK2 LCK LYN MAP2K1 MAPK1 MAPK14 MAPK3 MAT1A MSH3 MSH4 MVK PAK1 PAK2 PC PIK3CD PIK3CG PRKCE PRKCZ PSMC4 RFC2 RFC4 RFC5 SMARCA4 SRC SYK TEC TGFBR1 UBE2D2 XRCC5 ZAP70
GO:0048518	positive regulation of biological process	56	5.25085e-18	ABL1 ABL1 AKT1 ATF4 BCL6 BTK CALM1 CCND1 CCND2 CCND3 CCNE1 CDC42 CDK2 CDK4 CDK6 CEBPB CEBPG DDIT3 FOS FOSL1 FOSL2 FYN GSK3B HRAS JAK2 JUN JUNB JUND LCK LYN MAP2K1 MAPK1 MAPK14 MSH6 NCK1 NRAS ODC1 PIK3R1 PLCG2 PPP5C PRKCE RAC1 RALA RAN RASA1 SH2D1A SHC1 SMARCA4 SOS1 SRC STX1A SYK TGFBR1 TIAM1 VAV1 VAV3 ZAP70
GO:0065007	biological regulation	127	8.96843e-18	ABL1 ABL1 ABL2 ADH5 AKT1 ATF2 ATF3 ATF4 ATF7 ATP5A1 ATP5B BACH1 BATF BCL6 BLK BRAF BTK BTRC CALM1 CCNC CCND1 CCND2 CCND3 CCNE1 CD2AP CDC16 CDC2 CDC42 CDK2 CDK4 CDK6 CEBPB CEBPG CRK CRKL CSK CTBP1 CTBP2 DBP DDIT3 DPP4 EIF4A2 FOS FOSL1 FOSL2 FYN GDI2 GRAP2 GRB2 GSK3B HLF HRAS ITK JAK2 JUN JUNB JUND KPNA2 LCK LCP2 LYN MAP2K1 MAPK1 MAPK14 MAPK3 MSH2 MSH3 MSH6 NCK1 NFKB2 NRAS ODC1 PAK1 PAK2 PCNA PFN1 …
GO:0016773	phosphotransferase activity, alcohol group as acceptor	37	9.42139e-18	ABL1 ABL1 ABL2 AKT1 BLK BRAF BTK CCND1 CDC2 CDK2 CDK3 CDK4 CDK6 CRKL CSK FYN GSK3B HCK ITK JAK2 LCK LYN MAP2K1 MAPK1 MAPK14 MAPK3 MVK PAK1 PAK2 PIK3CD PIK3CG PRKCE PRKCZ SRC SYK TEC TGFBR1 ZAP70
GO:0004672	protein kinase activity	34	1.11136e-17	ABL1 ABL1 ABL2 AKT1 BLK BRAF BTK CCND1 CDC2 CDK2 CDK3 CDK4 CDK6 CRKL CSK FYN GSK3B HCK ITK JAK2 LCK LYN MAP2K1 MAPK1 MAPK14 MAPK3 PAK1 PAK2 PRKCE PRKCZ SRC SYK TEC TGFBR1 ZAP70
GO:0032991	macromolecular complex	67	1.51001e-16	ACTB ATF4 ATP5A1 ATP5B CCND1 CCND2 CCND3 CD2AP CDK2 CDK4 CDK6 CSE1L EEF1A1 EEF1B2 EEF1G EEF2 EIF4A1 EIF4A2 ENO2 FOS GSK3B JUN KPNA2 KPNA4 KPNA6 KPNB1 LSM2 LSM3 LSM6 MSH2 MSH3 MSH6 NFKB2 PCNA PIK3CD PIK3CG PIK3R1 PIK3R2 POLR2A POLR2B POLR2F POLR2J POLR2L PSMB1 PSMB2 PSMB3 PSMB6 PSMB7 PSMC4 RAN RAP1A RFC2 RFC4 RFC5 SEC23A SEC23B SHC1 SMARCA4 SNAP25 SNRPD3 SRP54 SYK TGFBR1 TUBG1 XRCC5 YY1 ZAP70
GO:0016301	kinase activity	37	1.53059e-16	ABL1 ABL1 ABL2 AKT1 BLK BRAF BTK CCND1 CDC2 CDK2 CDK3 CDK4 CDK6 CRKL CSK FYN GSK3B HCK ITK JAK2 LCK LYN MAP2K1 MAPK1 MAPK14 MAPK3 MVK PAK1 PAK2 PIK3CD PIK3CG PRKCE PRKCZ SRC SYK TEC TGFBR1 ZAP70
GO:0005488	binding	162	1.81385e-16	ABL1 ABL1 ABL2 ACTA1 ACTB ADH5 AKT1 ATF2 ATF3 ATF4 ATF7 ATP5A1 ATP5B BACH1 BATF BCL6 BLK BRAF BTK BTRC CALM1 CCNC CCND1 CCND2 CCND3 CCNE1 CD2AP CDC16 CDC2 CDC42 CDK2 CDK3 CDK4 CDK6 CEBPB CEBPG CRK CRKL CSE1L CSK CTBP1 CTBP2 DBP DDIT3 DDX18 DDX24 DPP4 EEF1A1 EEF1B2 EEF1G EEF2 EIF4A1 EIF4A2 ENO2 FOS FOSL1 FOSL2 FYN GART GRAP2 GRB2 GSK3B GSTM3 HCK HLF HRAS ITK JAK2 JUN JUNB JUND KPNA2 KPNA4 KPNA6 KP…
GO:0048522	positive regulation of cellular process	51	2.6316e-16	ABL1 ABL1 AKT1 ATF4 BCL6 BTK CCND1 CCND2 CCND3 CCNE1 CDC42 CDK2 CDK4 CDK6 CEBPB CEBPG DDIT3 FOS FOSL1 FOSL2 GSK3B HRAS JAK2 JUN JUNB JUND LCK LYN MAP2K1 MAPK1 MAPK14 MSH6 NCK1 NRAS ODC1 PIK3R1 PPP5C PRKCE RAC1 RALA RAN SHC1 SMARCA4 SOS1 SRC STX1A SYK TGFBR1 TIAM1 VAV1 VAV3 ZAP70
GO:0005654	nucleoplasm	28	7.44941e-16	AKT1 CCND1 CCNE1 CDC16 CDC2 CDK2 CDK4 KPNA2 KPNB1 MAPK1 MAPK14 MAPK3 NFKB2 PCNA POLR2A POLR2B POLR2C POLR2F POLR2H POLR2J POLR2K POLR2L RAN RFC2 RFC4 RFC5 SNRPD3 XRCC5
GO:0007264	small GTPase mediated signal transduction	23	1.79793e-15	BRAF CDC42 CRKL GRAP2 GRB2 HRAS MAP2K1 MAPK1 MAPK14 MAPK3 NRAS RAB5A RAC1 RALA RALGDS RAP1A RAP2A RRAS SHC1 SOS1 SRC TIAM1 VAV3
GO:0050794	regulation of cellular process	116	2.14192e-15	ABL1 ABL1 ABL2 AKT1 ATF2 ATF3 ATF4 ATF7 ATP5A1 ATP5B BACH1 BATF BCL6 BLK BRAF BTK BTRC CALM1 CCNC CCND1 CCND2 CCND3 CCNE1 CD2AP CDC16 CDC2 CDC42 CDK2 CDK4 CDK6 CEBPB CEBPG CRK CRKL CSK CTBP1 CTBP2 DBP DDIT3 DPP4 EIF4A2 FOS FOSL1 FOSL2 FYN GDI2 GRAP2 GRB2 GSK3B HLF HRAS ITK JAK2 JUN JUNB JUND KPNA2 LCK LCP2 LYN MAP2K1 MAPK1 MAPK14 MAPK3 MSH2 MSH3 MSH6 NCK1 NFKB2 NRAS ODC1 PAK1 PAK2 PCNA PFN1 PIK3C…
GO:0050789	regulation of biological process	118	3.33499e-15	ABL1 ABL1 ABL2 AKT1 ATF2 ATF3 ATF4 ATF7 ATP5A1 ATP5B BACH1 BATF BCL6 BLK BRAF BTK BTRC CALM1 CCNC CCND1 CCND2 CCND3 CCNE1 CD2AP CDC16 CDC2 CDC42 CDK2 CDK4 CDK6 CEBPB CEBPG CRK CRKL CSK CTBP1 CTBP2 DBP DDIT3 DPP4 EIF4A2 FOS FOSL1 FOSL2 FYN GDI2 GRAP2 GRB2 GSK3B HLF HRAS ITK JAK2 JUN JUNB JUND KPNA2 LCK LCP2 LYN MAP2K1 MAPK1 MAPK14 MAPK3 MSH2 MSH3 MSH6 NCK1 NFKB2 NRAS ODC1 PAK1 PAK2 PCNA PFN1 PIK3C…
GO:0044428	nuclear part	51	4.13363e-15	ABL1 ABL1 ACTB AKT1 ATF3 ATF4 CCND1 CCNE1 CD2AP CDC16 CDC2 CDK2 CDK4 CSE1L DDX24 FOS JUN KPNA2 KPNA4 KPNA6 KPNB1 LSM2 LSM3 LSM6 MAPK1 MAPK14 MAPK3 MSH2 MSH3 MSH4 MSH6 NFKB2 PCNA POLR2A POLR2B POLR2C POLR2F POLR2H POLR2J POLR2K POLR2L RAN RFC2 RFC4 RFC5 SMARCA4 SNRPD3 SRP54 TUBG1 XRCC5 YY1 ZNRD1
GO:0022402	cell cycle process	29	1.00803e-14	ABL1 ABL1 BTRC CCND1 CCND2 CCNE1 CD2AP CDC16 CDC2 CDK2 CDK3 CDK4 CDK6 DDIT3 FOSL1 GSK3B KPNA2 MAP2K1 MSH2 MSH4 MSH6 PPP5C PSMB1 PSMB2 PSMB3 PSMB6 PSMB7 PSMC4 RAN TUBG1
GO:0065009	regulation of molecular function	37	1.0867e-14	ABL1 ABL1 ABL2 AKT1 BCL6 BTRC CALM1 CCND1 CCND2 CCND3 CDC16 CDC2 CDC42 CEBPG DDIT3 GDI2 JAK2 LCK MAP2K1 MSH2 MSH3 MSH6 PAK1 PAK2 PLCG2 PSMB1 PSMB2 PSMB3 PSMB6 PSMB7 PSMC4 RAC1 SHC1 SMARCA4 SYK TGFBR1 VAV1 VAV3
GO:0043085	positive regulation of catalytic activity	27	2.3884e-14	ABL1 ABL1 ABL2 AKT1 BTRC CCND1 CCND2 CCND3 CDC16 CDC2 CDC42 LCK MAP2K1 MSH2 MSH3 MSH6 PAK1 PSMB1 PSMB2 PSMB3 PSMB6 PSMB7 PSMC4 RAC1 SHC1 SYK TGFBR1 VAV3
GO:0005737	cytoplasm	89	3.20019e-14	ABL1 ABL1 ABL2 ACTA1 ACTB ADH5 AKT1 ATF4 ATF7 BRAF BTK BTRC CALM1 CCND3 CD2AP CDC16 CDC2 CDC42 CDK2 CDK3 CDK6 CEBPB CRK CRKL CSE1L CSK CTBP1 DDIT3 DDX24 EEF1A1 EEF2 ENO2 GART GDI2 GRAP2 GSK3B GSTM3 HCK HRAS JAK2 KPNA2 KPNA4 KPNA6 KPNB1 LCK LCP2 LSM6 LYN MAPK1 MAPK14 MVK NCK1 NFKB2 ODC1 PAK1 PAK2 PC PFN1 PIK3R1 PLCG1 POLR2C PPP5C PRKCZ PSMB1 PSMB2 PSMB3 PSMB6 PSMB7 PSMC4 PTPN6 RAC1 RAN RASA1 SH2D1…
GO:0007265	Ras protein signal transduction	15	3.95768e-14	CRKL GRAP2 GRB2 HRAS MAP2K1 MAPK1 MAPK14 MAPK3 NRAS RALA RALGDS RRAS SHC1 SOS1 SRC
GO:0034960	cellular biopolymer metabolic process	95	4.88652e-14	ABL1 ABL1 ABL2 ADH5 AKT1 ATF2 ATF4 ATF7 BATF BCL6 BLK BRAF BTK BTRC CCNC CD2AP CDC16 CDC2 CDK2 CDK3 CDK4 CDK6 CEBPG CSK CTBP1 DBP DDIT3 DDX24 DPP4 EEF1A1 EEF1B2 EEF1G EEF2 EIF4A1 EIF4A2 FOS FYN GSK3B HCK HLF ITK JAK2 KPNA2 LCK LSM2 LSM3 LSM6 LYN MAP2K1 MAPK1 MAPK14 MAPK3 MSH2 MSH3 MSH4 MSH6 PAK1 PAK2 PCNA PIK3CD PIK3CG PIK3R1 PMPCB POLR2A POLR2B POLR2C POLR2F POLR2H POLR2J POLR2K POLR2L PPP5C PRK…
GO:0044260	cellular macromolecule metabolic process	96	5.36345e-14	ABL1 ABL1 ABL2 ADH5 AKT1 ATF2 ATF4 ATF7 BATF BCL6 BLK BRAF BTK BTRC CCNC CD2AP CDC16 CDC2 CDK2 CDK3 CDK4 CDK6 CEBPG CSK CTBP1 DBP DDIT3 DDX24 DPP4 EEF1A1 EEF1B2 EEF1G EEF2 EIF4A1 EIF4A2 ENO2 FOS FYN GSK3B HCK HLF ITK JAK2 KPNA2 LCK LSM2 LSM3 LSM6 LYN MAP2K1 MAPK1 MAPK14 MAPK3 MSH2 MSH3 MSH4 MSH6 PAK1 PAK2 PCNA PIK3CD PIK3CG PIK3R1 PMPCB POLR2A POLR2B POLR2C POLR2F POLR2H POLR2J POLR2K POLR2L PPP5…
GO:0043283	biopolymer metabolic process	95	6.34168e-14	ABL1 ABL1 ABL2 ADH5 AKT1 ATF2 ATF4 ATF7 BATF BCL6 BLK BRAF BTK BTRC CCNC CD2AP CDC16 CDC2 CDK2 CDK3 CDK4 CDK6 CEBPG CSK CTBP1 DBP DDIT3 DDX24 DPP4 EEF1A1 EEF1B2 EEF1G EEF2 EIF4A1 EIF4A2 FOS FYN GSK3B HCK HLF ITK JAK2 KPNA2 LCK LSM2 LSM3 LSM6 LYN MAP2K1 MAPK1 MAPK14 MAPK3 MSH2 MSH3 MSH4 MSH6 PAK1 PAK2 PCNA PIK3CD PIK3CG PIK3R1 PMPCB POLR2A POLR2B POLR2C POLR2F POLR2H POLR2J POLR2K POLR2L PPP5C PRK…
GO:0000307	cyclin-dependent protein kinase holoenzyme complex	7	6.91119e-14	CCND1 CCND2 CCND3 CDK2 CDK4 CDK6 PCNA
GO:0016740	transferase activity	50	7.45355e-14	ABL1 ABL1 ABL2 AKT1 BLK BRAF BTK CCND1 CDC2 CDK2 CDK3 CDK4 CDK6 CRKL CSK FYN GART GSK3B GSTM3 HCK ITK JAK2 LCK LYN MAP2K1 MAPK1 MAPK14 MAPK3 MAT1A MSH2 MVK PAK1 PAK2 PIK3CD PIK3CG POLR2A POLR2B POLR2C POLR2F POLR2H POLR2J POLR2K POLR2L PRKCE PRKCZ SRC SYK TEC TGFBR1 ZAP70 ZNRD1
GO:0007154	cell communication	77	7.91679e-14	ABL1 ABL1 ABL2 AKT1 BLK BRAF BTK BTRC CALM1 CCND1 CCNE1 CD2AP CDC42 CDK4 CRK CRKL DDIT3 FOS FOSL1 FYN GDI2 GRAP2 GRB2 GSK3B HRAS ITK JAK2 JUN LCK LCP2 LYN MAP2K1 MAPK1 MAPK14 MAPK3 MSH2 MSH6 NFKB2 NRAS PAK1 PAK2 PCNA PIK3CD PIK3CG PIK3R1 PIK3R2 PLCG1 PLCG2 PRKCE PRKCZ PTPN6 RAB5A RAC1 RALA RALGDS RAN RAP1A RAP2A RASA1 RFC4 RRAS SH2D1A SH3BP2 SHB SHC1 SNAP25 SOS1 SRC STX1A STXBP1 SYK TEC TGFBR1 TI…
GO:0043170	macromolecule metabolic process	96	9.09444e-14	ABL1 ABL1 ABL2 ADH5 AKT1 ATF2 ATF4 ATF7 BATF BCL6 BLK BRAF BTK BTRC CCNC CD2AP CDC16 CDC2 CDK2 CDK3 CDK4 CDK6 CEBPG CSK CTBP1 DBP DDIT3 DDX24 DPP4 EEF1A1 EEF1B2 EEF1G EEF2 EIF4A1 EIF4A2 ENO2 FOS FYN GSK3B HCK HLF ITK JAK2 KPNA2 LCK LSM2 LSM3 LSM6 LYN MAP2K1 MAPK1 MAPK14 MAPK3 MSH2 MSH3 MSH4 MSH6 PAK1 PAK2 PCNA PIK3CD PIK3CG PIK3R1 PMPCB POLR2A POLR2B POLR2C POLR2F POLR2H POLR2J POLR2K POLR2L PPP5…
GO:0008150	biological_process	167	9.58226e-14	ABL1 ABL1 ABL2 ACTA1 ACTB ADH5 AKT1 ATF2 ATF3 ATF4 ATF7 ATP5A1 ATP5B BACH1 BATF BCL6 BLK BRAF BTK BTRC CALM1 CCNC CCND1 CCND2 CCND3 CCNE1 CD2AP CDC16 CDC2 CDC42 CDK2 CDK3 CDK4 CDK6 CEBPB CEBPG CRK CRKL CSE1L CSK CTBP1 CTBP2 DBP DDIT3 DDX24 DPP4 EEF1A1 EEF1B2 EEF1G EEF2 EIF4A1 EIF4A2 ENO2 FOS FOSL1 FOSL2 FYN GART GDI2 GRAP2 GRB2 GSK3B GSTM3 HCK HLF HRAS ITK JAK2 JUN JUNB JUND KPNA2 KPNA4 KPNA6 KPN…
GO:0043687	post-translational protein modification	41	1.27087e-13	ABL1 ABL1 ABL2 ADH5 AKT1 BLK BRAF BTK CDC2 CDK2 CDK3 CDK4 CDK6 CSK CTBP1 FYN GSK3B HCK ITK JAK2 LCK LYN MAP2K1 MAPK1 MAPK14 MAPK3 PAK1 PAK2 PIK3CD PIK3CG PIK3R1 PPP5C PRKCE PRKCZ PTPN6 SHC1 SRC SYK TEC TGFBR1 UBE2D2 ZAP70
GO:0003824	catalytic activity	94	1.68506e-13	ABL1 ABL1 ABL2 ADH5 AKT1 ATP5A1 ATP5B BLK BRAF BTK BTRC CCND1 CDC2 CDC42 CDK2 CDK3 CDK4 CDK6 CRKL CSK CTBP1 CTBP2 DDX18 DDX24 DPP4 EEF1A1 EEF2 EIF4A1 EIF4A2 ENO2 FYN GART GSK3B GSTM3 HCK ITK JAK2 LCK LYN MAP2K1 MAPK1 MAPK14 MAPK3 MAT1A MSH2 MVK ODC1 PAK1 PAK2 PC PCNA PIK3CD PIK3CG PLCG1 PLCG2 PMPCB POLR2A POLR2B POLR2C POLR2F POLR2H POLR2J POLR2K POLR2L PPP5C PRKCE PRKCZ PSMB1 PSMB2 PSMB3 PSMB6 P…
GO:0004713	protein tyrosine kinase activity	17	3.50564e-13	ABL1 ABL1 ABL2 BLK BTK CRKL CSK FYN HCK ITK JAK2 LCK LYN MAP2K1 SRC SYK TEC ZAP70
GO:0007165	signal transduction	72	7.92517e-13	ABL1 ABL1 ABL2 AKT1 BLK BRAF BTK BTRC CALM1 CCND1 CCNE1 CD2AP CDC42 CDK4 CRK CRKL DDIT3 FOS FYN GDI2 GRAP2 GRB2 GSK3B HRAS ITK JAK2 JUN LCK LCP2 LYN MAP2K1 MAPK1 MAPK14 MAPK3 MSH2 MSH6 NFKB2 NRAS PAK1 PAK2 PCNA PIK3CD PIK3CG PIK3R1 PIK3R2 PLCG1 PLCG2 PRKCE PRKCZ PTPN6 RAB5A RAC1 RALA RALGDS RAN RAP1A RAP2A RASA1 RFC4 RRAS SH3BP2 SHB SHC1 SOS1 SRC SYK TEC TGFBR1 TIAM1 VAV1 VAV2 VAV3 ZAP70
GO:0050793	regulation of developmental process	37	7.29796e-12	ABL1 ABL1 AKT1 BCL6 BRAF BTK CCND1 CDC2 CDC42 CDK4 CDK6 CEBPB CEBPG DDIT3 GSK3B HRAS JUNB JUND LCK MAP2K1 MAPK1 MAPK14 MSH2 MSH6 NRAS PIK3CG PIK3R1 PLCG2 PRKCE PRKCZ RAC1 RALA RASA1 SRC SYK TGFBR1 TIAM1 ZAP70
GO:0050790	regulation of catalytic activity	31	7.7943e-12	ABL1 ABL1 ABL2 AKT1 BCL6 BTRC CCND1 CCND2 CCND3 CDC16 CDC2 CDC42 GDI2 LCK MAP2K1 MSH2 MSH3 MSH6 PAK1 PAK2 PSMB1 PSMB2 PSMB3 PSMB6 PSMB7 PSMC4 RAC1 SHC1 SYK TGFBR1 VAV1 VAV3
GO:0046983	protein dimerization activity	24	1.06606e-11	ADH5 ATF2 ATF3 ATF4 ATF7 BACH1 BATF CEBPB CEBPG DBP DDIT3 DPP4 FOS FOSL1 FOSL2 HLF JUN JUNB JUND MSH2 POLR2C POLR2J STX1A TGFBR1
GO:0060090	molecular adaptor activity	11	1.58602e-11	CRKL GRAP2 GRB2 NCK1 SH2D1A SH3BP2 SHB SHC1 SLA SRC VAV3
GO:0044419	interspecies interaction between organisms	18	5.63257e-11	BTRC EIF4A2 FYN GRB2 HCK KPNA2 KPNB1 LCK LYN MAPK1 MAPK3 PAK2 PIK3R1 PLCG1 RALA RAN SRC SYK
GO:0006464	protein modification process	41	7.47027e-11	ABL1 ABL1 ABL2 ADH5 AKT1 BLK BRAF BTK CDC2 CDK2 CDK3 CDK4 CDK6 CSK CTBP1 FYN GSK3B HCK ITK JAK2 LCK LYN MAP2K1 MAPK1 MAPK14 MAPK3 PAK1 PAK2 PIK3CD PIK3CG PIK3R1 PPP5C PRKCE PRKCZ PTPN6 SHC1 SRC SYK TEC TGFBR1 UBE2D2 ZAP70
GO:0044237	cellular metabolic process	105	7.76346e-11	ABL1 ABL1 ABL2 ADH5 AKT1 ATF2 ATF4 ATF7 ATP5A1 ATP5B BATF BCL6 BLK BRAF BTK BTRC CCNC CD2AP CDC16 CDC2 CDK2 CDK3 CDK4 CDK6 CEBPG CSK CTBP1 DBP DDIT3 DDX24 DPP4 EEF1A1 EEF1B2 EEF1G EEF2 EIF4A1 EIF4A2 ENO2 FOS FYN GART GSK3B HCK HLF ITK JAK2 KPNA2 LCK LSM2 LSM3 LSM6 LYN MAP2K1 MAPK1 MAPK14 MAPK3 MAT1A MSH2 MSH3 MSH4 MSH6 MVK ODC1 PAK1 PAK2 PC PCNA PIK3CD PIK3CG PIK3R1 PLCG1 PLCG2 PMPCB POLR2A POLR2…
GO:0043412	biopolymer modification	42	9.25045e-11	ABL1 ABL1 ABL2 ADH5 AKT1 BLK BRAF BTK CDC2 CDK2 CDK3 CDK4 CDK6 CSK CTBP1 FOS FYN GSK3B HCK ITK JAK2 LCK LYN MAP2K1 MAPK1 MAPK14 MAPK3 PAK1 PAK2 PIK3CD PIK3CG PIK3R1 PPP5C PRKCE PRKCZ PTPN6 SHC1 SRC SYK TEC TGFBR1 UBE2D2 ZAP70
GO:0003899	DNA-directed RNA polymerase activity	9	1.00968e-10	POLR2A POLR2B POLR2C POLR2F POLR2H POLR2J POLR2K POLR2L ZNRD1
GO:0034062	RNA polymerase activity	9	1.00968e-10	POLR2A POLR2B POLR2C POLR2F POLR2H POLR2J POLR2K POLR2L ZNRD1
GO:0043231	intracellular membrane-bounded organelle	116	1.161e-10	ABL1 ABL1 ADH5 AKT1 ATF2 ATF3 ATF4 ATF7 ATP5A1 ATP5B BATF BCL6 BRAF BTK CCNC CCND1 CCND2 CCND3 CCNE1 CD2AP CDC16 CDC2 CDK2 CDK3 CDK4 CDK6 CEBPB CEBPG CRK CSE1L CTBP1 CTBP2 DBP DDIT3 FOS FOSL1 FOSL2 FYN GART GRAP2 GRB2 GSK3B HLF HRAS JAK2 JUN JUNB JUND KPNA2 KPNA4 KPNA6 KPNB1 LCK LSM2 LSM3 LSM6 LYN MAP2K1 MAPK1 MAPK14 MAPK3 MSH2 MSH4 MSH6 MVK NCK1 NFKB2 NRAS ODC1 PAK1 PAK2 PC PCNA PFN1 PMPCB POLR2…
GO:0043227	membrane-bounded organelle	116	1.18463e-10	ABL1 ABL1 ADH5 AKT1 ATF2 ATF3 ATF4 ATF7 ATP5A1 ATP5B BATF BCL6 BRAF BTK CCNC CCND1 CCND2 CCND3 CCNE1 CD2AP CDC16 CDC2 CDK2 CDK3 CDK4 CDK6 CEBPB CEBPG CRK CSE1L CTBP1 CTBP2 DBP DDIT3 FOS FOSL1 FOSL2 FYN GART GRAP2 GRB2 GSK3B HLF HRAS JAK2 JUN JUNB JUND KPNA2 KPNA4 KPNA6 KPNB1 LCK LSM2 LSM3 LSM6 LYN MAP2K1 MAPK1 MAPK14 MAPK3 MSH2 MSH4 MSH6 MVK NCK1 NFKB2 NRAS ODC1 PAK1 PAK2 PC PCNA PFN1 PMPCB POLR2…
GO:0005634	nucleus	89	1.21119e-10	ABL1 ABL1 AKT1 ATF2 ATF3 ATF4 ATF7 BATF BCL6 BRAF BTK CCNC CCND1 CCND2 CCND3 CCNE1 CDC16 CDC2 CDK2 CDK4 CDK6 CEBPB CEBPG CRK CSE1L CTBP1 CTBP2 DBP DDIT3 FOS FOSL1 FOSL2 GART GRAP2 GSK3B HLF JAK2 JUN JUNB JUND KPNA2 KPNA4 KPNA6 KPNB1 LSM2 LSM3 LSM6 LYN MAPK1 MAPK14 MAPK3 MSH2 MSH4 MSH6 NFKB2 ODC1 PAK1 PAK2 PCNA PFN1 POLR2A POLR2B POLR2C POLR2F POLR2H POLR2J POLR2K POLR2L PPP5C PSMB1 PSMB2 PSMB3 PS…
GO:0044444	cytoplasmic part	83	1.83265e-10	ACTA1 ACTB ADH5 AKT1 ATF2 ATP5A1 ATP5B BTRC CALM1 CCND1 CCNE1 CD2AP CDC16 CDC2 CDC42 CDK2 CDK4 CRK EEF1A1 EEF1B2 EEF1G EIF4A1 EIF4A2 ENO2 FYN GART GRAP2 GRB2 GSK3B HRAS ITK JUN KPNB1 LCK LCP2 LYN MAP2K1 MAPK1 MAPK14 MAPK3 MVK NCK1 NFKB2 NRAS ODC1 PAK1 PAK2 PC PIK3CD PIK3CG PIK3R1 PIK3R2 PLCG1 PMPCB PRKCZ PSMB1 PSMB2 PSMB3 PSMB6 PSMB7 PSMC4 PTPN6 RAB5A RAC1 RALGDS RAN RAP1A SEC23A SEC23B SHC1 SLA …
GO:0003674	molecular_function	168	4.86084e-10	ABL1 ABL1 ABL2 ACTA1 ACTB ADH5 AKT1 ATF2 ATF3 ATF4 ATF7 ATP5A1 ATP5B BACH1 BATF BCL6 BLK BRAF BTK BTRC CALM1 CCNC CCND1 CCND2 CCND3 CCNE1 CD2AP CDC16 CDC2 CDC42 CDK2 CDK3 CDK4 CDK6 CEBPB CEBPG CRK CRKL CSE1L CSK CTBP1 CTBP2 DBP DDIT3 DDX18 DDX24 DPP4 EEF1A1 EEF1B2 EEF1G EEF2 EIF4A1 EIF4A2 ENO2 FOS FOSL1 FOSL2 FYN GART GDI2 GRAP2 GRB2 GSK3B GSTM3 HCK HLF HRAS ITK JAK2 JUN JUNB JUND KPNA2 KPNA4 KPN…
GO:0005070	SH3/SH2 adaptor activity	9	5.1703e-10	CRKL GRAP2 GRB2 SH2D1A SH3BP2 SHB SLA SRC VAV3
GO:0006350	transcription	29	9.34291e-10	ATF2 ATF3 ATF4 AFT7 BACH1 BATF BCL6 CCNC CEBPB CEBPG DBP DDIT3 HLF JUN JUNB JUND POLR2A POLR2B POLR2C POLR2H POLR2J POLR2K POLR2L PPP5C SMARCA4 YY1 ZNRD1 NFKB2 HLF
GO:0007049	cell cycle	26	1.10247e-09	ABL1 CCNC CCND1 CCND2 CCND3 CCNE1 CDC42 CDK3 CDK4 CDK6 CSK HRAS JAK2 LCK MAPK3 NRAS PCNA RAN CDC16 CDK2 MAPK1 MSH2 RAP1A GRAP2 GRB2 SH2D1A
GO:0050851	antigen receptor-mediated signaling pathway	7	1.30974e-09	FYN LCK LYN MAPK1 PLCG2 SYK ZAP70
GO:0044267	cellular protein metabolic process	55	1.59461e-09	ABL1 ABL1 ABL2 ADH5 AKT1 BLK BRAF BTK BTRC CD2AP CDC16 CDC2 CDK2 CDK3 CDK4 CDK6 CSK CTBP1 DPP4 EIF4A1 EIF4A2 FYN GSK3B HCK ITK JAK2 LCK LYN MAP2K1 MAPK1 MAPK14 MAPK3 PAK1 PAK2 PIK3CD PIK3CG PIK3R1 PMPCB PPP5C PRKCE PRKCZ PSMB1 PSMB2 PSMB3 PSMB6 PSMB7 PSMC4 PTPN6 SHC1 SRC SYK TEC TGFBR1 UBE2D2 UQCRC1 ZAP70
GO:0019538	protein metabolic process	55	1.82718e-09	ABL1 ABL1 ABL2 ADH5 AKT1 BLK BRAF BTK BTRC CD2AP CDC16 CDC2 CDK2 CDK3 CDK4 CDK6 CSK CTBP1 DPP4 EIF4A1 EIF4A2 FYN GSK3B HCK ITK JAK2 LCK LYN MAP2K1 MAPK1 MAPK14 MAPK3 PAK1 PAK2 PIK3CD PIK3CG PIK3R1 PMPCB PPP5C PRKCE PRKCZ PSMB1 PSMB2 PSMB3 PSMB6 PSMB7 PSMC4 PTPN6 SHC1 SRC SYK TEC TGFBR1 UBE2D2 UQCRC1 ZAP70
GO:0051094	positive regulation of developmental process	22	4.59852e-09	ABL1 ABL1 AKT1 BCL6 BTK CDC42 CEBPB CEBPG DDIT3 JUNB JUND LCK MAP2K1 MAPK1 MAPK14 MSH6 PRKCE RAC1 RALA SRC SYK TIAM1 ZAP70
GO:0002429	immune response-activating cell surface receptor signaling pathway	7	4.88483e-09	FYN LCK LYN MAPK1 PLCG2 SYK ZAP70
GO:0018193	peptidyl-amino acid modification	12	5.2651e-09	ABL1 ABL1 ABL2 ADH5 AKT1 GSK3B JAK2 LCK LYN PRKCZ SRC TGFBR1 ZAP70
GO:0002768	immune response-regulating cell surface receptor signaling pathway	7	8.64622e-09	FYN LCK LYN MAPK1 PLCG2 SYK ZAP70
GO:0006368	RNA elongation from RNA polymerase II promoter	8	1.089e-08	POLR2A POLR2B POLR2C POLR2F POLR2H POLR2J POLR2K POLR2L
GO:0018108	peptidyl-tyrosine phosphorylation	7	1.46184e-08	ABL1 ABL1 ABL2 JAK2 LCK LYN SRC ZAP70
GO:0016043	cellular component organization	47	1.58383e-08	ABL1 ABL1 ACTA1 AKT1 BCL6 CD2AP CDC2 CDC42 CDK2 CDK3 CRK CSE1L HRAS KPNB1 MAP2K1 MSH2 MSH3 MSH4 NCK1 NFKB2 NRAS PAK1 PFN1 POLR2A POLR2B POLR2C POLR2F POLR2H POLR2J POLR2K POLR2L PPP5C RAB5A RAC1 RALA RAN SEC23A SMARCA4 SNAP23 SRC STXBP1 SYK TFRC TGFBR1 TUBG1 VAV1 VAV3 XRCC5
GO:0030674	protein binding, bridging	10	1.73536e-08	CRKL GRAP2 GRB2 SH2D1A SH3BP2 SHB SLA SRC STX1A VAV3
GO:0010941	regulation of cell death	24	1.84569e-08	ABL1 ABL1 AKT1 BCL6 BRAF BTK CDC2 CEBPB CEBPG DDIT3 GSK3B HRAS LCK MAPK1 MSH2 MSH6 NRAS PIK3CG PIK3R1 PLCG2 PRKCE PRKCZ RASA1 SRC TGFBR1
GO:0043067	regulation of programmed cell death	24	1.84569e-08	ABL1 ABL1 AKT1 BCL6 BRAF BTK CDC2 CEBPB CEBPG DDIT3 GSK3B HRAS LCK MAPK1 MSH2 MSH6 NRAS PIK3CG PIK3R1 PLCG2 PRKCE PRKCZ RASA1 SRC TGFBR1
GO:0006354	RNA elongation	8	2.24129e-08	POLR2A POLR2B POLR2C POLR2F POLR2H POLR2J POLR2K POLR2L
GO:0051437	positive regulation of ubiquitin-protein ligase activity during mitotic cell cycle	9	2.36294e-08	BTRC CDC16 CDC2 PSMB1 PSMB2 PSMB3 PSMB6 PSMB7 PSMC4
GO:0018212	peptidyl-tyrosine modification	7	2.37666e-08	ABL1 ABL1 ABL2 JAK2 LCK LYN SRC ZAP70
GO:0002757	immune response-activating signal transduction	7	2.99131e-08	FYN LCK LYN MAPK1 PLCG2 SYK ZAP70
GO:0051443	positive regulation of ubiquitin-protein ligase activity	9	3.06556e-08	BTRC CDC16 CDC2 PSMB1 PSMB2 PSMB3 PSMB6 PSMB7 PSMC4
GO:0051439	regulation of ubiquitin-protein ligase activity during mitotic cell cycle	9	3.48075e-08	BTRC CDC16 CDC2 PSMB1 PSMB2 PSMB3 PSMB6 PSMB7 PSMC4
GO:0005057	receptor signaling protein activity	12	4.32024e-08	BRAF JAK2 LYN MAP2K1 MAPK1 MAPK14 MAPK3 PLCG1 SHC1 SYK TGFBR1 TIAM1
GO:0010646	regulation of cell communication	25	4.44296e-08	BCL6 CCND1 HRAS JAK2 LCK LYN NRAS PPP5C PRKCZ RAC1 RALGDS RASA1 SHC1 SNAP25 SOS1 SRC STX1A STXBP1 SYK TGFBR1 TIAM1 VAV1 VAV2 VAV3 ZAP70
GO:0051351	positive regulation of ligase activity	9	4.46067e-08	BTRC CDC16 CDC2 PSMB1 PSMB2 PSMB3 PSMB6 PSMB7 PSMC4
GO:0002764	immune response-regulating signal transduction	7	4.63015e-08	FYN LCK LYN MAPK1 PLCG2 SYK ZAP70
GO:0006298	mismatch repair	6	5.91153e-08	ABL1 ABL1 MSH2 MSH3 MSH4 MSH6 PCNA
GO:0045005	maintenance of fidelity during DNA-dependent DNA replication	6	5.91153e-08	ABL1 ABL1 MSH2 MSH3 MSH4 MSH6 PCNA
GO:0042981	regulation of apoptosis	23	6.11172e-08	ABL1 ABL1 AKT1 BCL6 BRAF BTK CDC2 CEBPB CEBPG DDIT3 GSK3B HRAS LCK MAPK1 MSH2 MSH6 NRAS PIK3CG PIK3R1 PRKCE PRKCZ RASA1 SRC TGFBR1
GO:0043565	sequence-specific DNA binding	21	6.70142e-08	ATF2 ATF3 ATF4 ATF7 BACH1 BATF BCL6 CEBPB CEBPG DBP DDIT3 FOS FOSL1 FOSL2 HLF JUN JUNB JUND MSH2 MSH3 XRCC5
GO:0051438	regulation of ubiquitin-protein ligase activity	9	8.02948e-08	BTRC CDC16 CDC2 PSMB1 PSMB2 PSMB3 PSMB6 PSMB7 PSMC4
GO:0051340	regulation of ligase activity	9	1.11968e-07	BTRC CDC16 CDC2 PSMB1 PSMB2 PSMB3 PSMB6 PSMB7 PSMC4
GO:0005663	DNA replication factor C complex	4	1.41429e-07	PCNA RFC2 RFC4 RFC5
GO:0045910	negative regulation of DNA recombination	4	1.41429e-07	BCL6 MSH2 MSH3 MSH6
GO:0042127	regulation of cell proliferation	23	1.46536e-07	ATP5A1 BCL6 CCND2 CDK2 CDK4 CDK6 CSK CTBP1 CTBP2 DBP FOSL1 FOSL2 HRAS JAK2 JUN LYN NCK1 NRAS ODC1 SHC1 SYK TGFBR1 ZAP70
GO:0008284	positive regulation of cell proliferation	16	1.68874e-07	BCL6 CCND2 CDK2 CDK4 CDK6 FOSL1 FOSL2 HRAS LYN NCK1 NRAS ODC1 SHC1 SYK TGFBR1 ZAP70
GO:0033674	positive regulation of kinase activity	12	1.78282e-07	AKT1 CCND1 CCND2 CCND3 CDC42 MAP2K1 PAK1 RAC1 SHC1 SYK TGFBR1 VAV3
GO:0017111	nucleoside-triphosphatase activity	23	2.02554e-07	ATP5A1 ATP5B CDC42 DDX18 DDX24 EEF1A1 EEF2 EIF4A1 EIF4A2 PSMC4 RAB5A RAC1 RAN RAP1A RAP2A RFC2 RFC4 RFC5 RRAS SMARCA4 SRP54 TUBG1 XRCC5
GO:0009966	regulation of signal transduction	22	2.09386e-07	BCL6 CCND1 HRAS JAK2 LCK LYN NRAS PPP5C PRKCZ RAC1 RALGDS RASA1 SHC1 SOS1 SRC SYK TGFBR1 TIAM1 VAV1 VAV2 VAV3 ZAP70
GO:0051056	regulation of small GTPase mediated signal transduction	11	2.10259e-07	BCL6 HRAS NRAS RAC1 RALGDS RASA1 SOS1 TIAM1 VAV1 VAV2 VAV3
GO:0010498	proteasomal protein catabolic process	9	2.54817e-07	CD2AP CDC16 CDC2 PSMB1 PSMB2 PSMB3 PSMB6 PSMB7 PSMC4
GO:0043161	proteasomal ubiquitin-dependent protein catabolic process	9	2.54817e-07	CD2AP CDC16 CDC2 PSMB1 PSMB2 PSMB3 PSMB6 PSMB7 PSMC4
GO:0045321	leukocyte activation	12	2.57699e-07	BCL6 CEBPG DPP4 LCK LCP2 MSH2 MSH6 NCK1 PIK3R1 PLCG2 SHB VAV1
GO:0046649	lymphocyte activation	11	2.59195e-07	BCL6 CEBPG DPP4 LCK MSH2 MSH6 NCK1 PIK3R1 PLCG2 SHB VAV1
GO:0031145	anaphase-promoting complex-dependent proteasomal ubiquitin-dependent protein catabolic process	8	2.59602e-07	CDC16 CDC2 PSMB1 PSMB2 PSMB3 PSMB6 PSMB7 PSMC4
GO:0010604	positive regulation of macromolecule metabolic process	23	2.63704e-07	AKT1 ATF4 CCND1 CCND2 CCND3 CCNE1 CDK4 CEBPB CEBPG DDIT3 FOS FOSL1 JAK2 JUN LYN MAPK14 NCK1 RAC1 RAN SHC1 SMARCA4 SYK TGFBR1
GO:0001775	cell activation	13	2.63729e-07	BCL6 CEBPG DPP4 LCK LCP2 MSH2 MSH6 NCK1 NFKB2 PIK3R1 PLCG2 SHB VAV1
GO:0043069	negative regulation of programmed cell death	15	2.64737e-07	AKT1 BCL6 BRAF CDC2 CEBPB GSK3B HRAS MSH2 NRAS PIK3CG PIK3R1 PLCG2 PRKCZ RASA1 TGFBR1
GO:0051347	positive regulation of transferase activity	12	2.73634e-07	AKT1 CCND1 CCND2 CCND3 CDC42 MAP2K1 PAK1 RAC1 SHC1 SYK TGFBR1 VAV3
GO:0045737	positive regulation of cyclin-dependent protein kinase activity	4	3.27424e-07	AKT1 CCND1 CCND2 CCND3
GO:0006367	transcription initiation from RNA polymerase II promoter	8	3.29833e-07	POLR2A POLR2B POLR2C POLR2F POLR2H POLR2J POLR2K POLR2L
GO:0031325	positive regulation of cellular metabolic process	23	3.78187e-07	AKT1 ATF4 CCND1 CCND2 CCND3 CCNE1 CDK4 CEBPB CEBPG DDIT3 FOS FOSL1 JAK2 JUN LYN MAPK14 NCK1 RAC1 RAN SHC1 SMARCA4 SYK TGFBR1
GO:0016462	pyrophosphatase activity	23	3.87905e-07	ATP5A1 ATP5B CDC42 DDX18 DDX24 EEF1A1 EEF2 EIF4A1 EIF4A2 PSMC4 RAB5A RAC1 RAN RAP1A RAP2A RFC2 RFC4 RFC5 RRAS SMARCA4 SRP54 TUBG1 XRCC5
GO:0016818	hydrolase activity, acting on acid anhydrides, in phosphorus-containing anhydrides	23	4.18458e-07	ATP5A1 ATP5B CDC42 DDX18 DDX24 EEF1A1 EEF2 EIF4A1 EIF4A2 PSMC4 RAB5A RAC1 RAN RAP1A RAP2A RFC2 RFC4 RFC5 RRAS SMARCA4 SRP54 TUBG1 XRCC5
GO:0016817	hydrolase activity, acting on acid anhydrides	23	4.51216e-07	ATP5A1 ATP5B CDC42 DDX18 DDX24 EEF1A1 EEF2 EIF4A1 EIF4A2 PSMC4 RAB5A RAC1 RAN RAP1A RAP2A RFC2 RFC4 RFC5 RRAS SMARCA4 SRP54 TUBG1 XRCC5
GO:0032270	positive regulation of cellular protein metabolic process	11	4.71863e-07	AKT1 CCND1 CCND2 CCND3 CDK4 JAK2 LYN NCK1 RAC1 SYK TGFBR1
GO:0004674	protein serine/threonine kinase activity	17	6.28422e-07	AKT1 BRAF CDC2 CDK2 CDK3 CDK4 CDK6 GSK3B MAP2K1 MAPK1 MAPK14 MAPK3 PAK1 PAK2 PRKCE PRKCZ TGFBR1
GO:0009893	positive regulation of metabolic process	23	6.8592e-07	AKT1 ATF4 CCND1 CCND2 CCND3 CCNE1 CDK4 CEBPB CEBPG DDIT3 FOS FOSL1 JAK2 JUN LYN MAPK14 NCK1 RAC1 RAN SHC1 SMARCA4 SYK TGFBR1
GO:0051247	positive regulation of protein metabolic process	11	7.31637e-07	AKT1 CCND1 CCND2 CCND3 CDK4 JAK2 LYN NCK1 RAC1 SYK TGFBR1
GO:0046578	regulation of Ras protein signal transduction	9	7.55826e-07	BCL6 HRAS NRAS RAC1 SOS1 TIAM1 VAV1 VAV2 VAV3
GO:0048519	negative regulation of biological process	36	8.11224e-07	AKT1 ATP5A1 ATP5B BCL6 BRAF CALM1 CCND1 CDC2 CDC42 CDK6 CEBPB CSK CTBP1 CTBP2 GSK3B HRAS JAK2 JUN LCK MAPK1 MSH2 MSH3 MSH6 NRAS PIK3CG PIK3R1 PIK3R2 PLCG2 PRKCZ RAC1 RAP1A RASA1 RRAS SMARCA4 STXBP1 TGFBR1
GO:0051052	regulation of DNA metabolic process	9	8.2194e-07	BCL6 CDK2 CEBPG KPNA2 MSH2 MSH3 MSH6 PCNA SHC1
GO:0048869	cellular developmental process	29	9.51759e-07	AKT1 BCL6 CCND1 CD2AP CDC42 CDK6 CEBPB CEBPG GSK3B HRAS JAK2 JUN JUNB LCK LYN MAP2K1 MAPK14 MSH2 NCK1 NFKB2 NRAS PIK3R1 PLCG2 RAC1 RASA1 SHB SMARCA4 VAV3 ZNRD1
GO:0051093	negative regulation of developmental process	18	9.68129e-07	AKT1 BCL6 BRAF CCND1 CDC2 CDK6 CEBPB GSK3B HRAS MAPK1 MSH2 NRAS PIK3CG PIK3R1 PLCG2 PRKCZ RASA1 TGFBR1
GO:0032300	mismatch repair complex	3	9.76723e-07	MSH2 MSH3 MSH6
GO:0051704	multi-organism process	19	1.00481e-06	BTRC EIF4A2 FOSL1 FYN GRB2 HCK KPNA2 KPNB1 LCK LYN MAPK1 MAPK3 PAK2 PIK3R1 PLCG1 RALA RAN SRC SYK
GO:0044464	cell part	163	1.16128e-06	ABL1 ABL1 ABL2 ACTA1 ACTB ADH5 AKT1 ATF2 ATF3 ATF4 ATF7 ATP5A1 ATP5B BATF BCL6 BRAF BTK BTRC CALM1 CCNC CCND1 CCND2 CCND3 CCNE1 CD2AP CDC16 CDC2 CDC42 CDK2 CDK3 CDK4 CDK6 CEBPB CEBPG CRK CRKL CSE1L CSK CTBP1 CTBP2 DBP DDIT3 DDX24 DPP4 EEF1A1 EEF1B2 EEF1G EEF2 EIF4A1 EIF4A2 ENO2 FOS FOSL1 FOSL2 FYN GART GDI2 GRAP2 GRB2 GSK3B GSTM3 HCK HLF HRAS ITK JAK2 JUN JUNB JUND KPNA2 KPNA4 KPNA6 KPNB1 LCK LCP…
GO:0043066	negative regulation of apoptosis	14	1.1991e-06	AKT1 BCL6 BRAF CDC2 CEBPB GSK3B HRAS MSH2 NRAS PIK3CG PIK3R1 PRKCZ RASA1 TGFBR1
GO:0060255	regulation of macromolecule metabolic process	56	1.25784e-06	ABL1 ABL1 AKT1 ATF2 ATF3 ATF4 ATF7 BACH1 BATF BCL6 CCNC CCND1 CCND2 CCND3 CCNE1 CDK2 CDK4 CDK6 CEBPB CEBPG CRK DBP DDIT3 EIF4A2 FOS FOSL1 FOSL2 HLF JAK2 JUN JUNB JUND KPNA2 LYN MAPK14 MSH2 MSH3 MSH6 NCK1 NFKB2 PCNA PFN1 PLCG2 POLR2A POLR2K POLR2L PRKCZ RAC1 RAN RASA1 SHC1 SMARCA4 SYK TGFBR1 UBE2D2 YY1 ZNRD1
GO:0004298	threonine-type endopeptidase activity	5	1.28185e-06	PSMB1 PSMB2 PSMB3 PSMB6 PSMB7
GO:0005839	proteasome core complex	5	1.28185e-06	PSMB1 PSMB2 PSMB3 PSMB6 PSMB7
GO:0070003	threonine-type peptidase activity	5	1.28185e-06	PSMB1 PSMB2 PSMB3 PSMB6 PSMB7
GO:0006352	transcription initiation	8	1.31319e-06	POLR2A POLR2B POLR2C POLR2F POLR2H POLR2J POLR2K POLR2L
GO:0008022	protein C-terminus binding	9	1.33372e-06	ABL1 ABL1 ATF4 CSK CTBP1 HRAS LCK MSH2 SRC XRCC5
GO:0000375	RNA splicing, via transesterification reactions	9	1.44143e-06	LSM2 POLR2A POLR2B POLR2C POLR2F POLR2H POLR2J POLR2K POLR2L
GO:0000377	RNA splicing, via transesterification reactions with bulged adenosine as nucleophile	9	1.44143e-06	LSM2 POLR2A POLR2B POLR2C POLR2F POLR2H POLR2J POLR2K POLR2L
GO:0000398	nuclear mRNA splicing, via spliceosome	9	1.44143e-06	LSM2 POLR2A POLR2B POLR2C POLR2F POLR2H POLR2J POLR2K POLR2L
GO:0016779	nucleotidyltransferase activity	9	1.55657e-06	POLR2A POLR2B POLR2C POLR2F POLR2H POLR2J POLR2K POLR2L ZNRD1
GO:0030155	regulation of cell adhesion	9	1.67955e-06	ATP5B BCL6 CDK6 DPP4 PIK3R1 RASA1 SRC VAV1 VAV3
GO:0050853	B cell receptor signaling pathway	4	1.91885e-06	LCK LYN MAPK1 SYK
GO:0001932	regulation of protein amino acid phosphorylation	9	2.60843e-06	CCND1 CCND2 CCND3 JAK2 JUN LYN PRKCZ SYK TGFBR1
GO:0042113	B cell activation	7	2.70049e-06	BCL6 CEBPG MSH2 MSH6 PIK3R1 PLCG2 SHB
GO:0048523	negative regulation of cellular process	33	2.86512e-06	AKT1 ATP5A1 ATP5B BCL6 BRAF CCND1 CDC2 CDC42 CDK6 CEBPB CSK CTBP1 CTBP2 GSK3B HRAS JAK2 JUN MAPK1 MSH2 MSH3 MSH6 NRAS PIK3CG PIK3R1 PLCG2 PRKCZ RAC1 RAP1A RASA1 RRAS SMARCA4 STXBP1 TGFBR1
GO:0051436	negative regulation of ubiquitin-protein ligase activity during mitotic cell cycle	7	3.72804e-06	CDC16 PSMB1 PSMB2 PSMB3 PSMB6 PSMB7 PSMC4
GO:0051096	positive regulation of helicase activity	3	3.87816e-06	MSH2 MSH3 MSH6
GO:0000018	regulation of DNA recombination	5	4.2187e-06	BCL6 KPNA2 MSH2 MSH3 MSH6
GO:0000060	protein import into nucleus, translocation	5	4.2187e-06	AKT1 BCL6 JAK2 JUN KPNB1
GO:0007243	protein kinase cascade	11	4.23075e-06	AKT1 BLK CRKL FYN JAK2 MAPK1 MAPK14 PIK3R1 SRC TEC ZAP70
GO:0051726	regulation of cell cycle	15	4.37111e-06	AKT1 BCL6 CCND1 CCND2 CCND3 CDC16 CDC42 CDK2 CDK4 JUN JUNB MAPK14 MSH2 RAP1A SMARCA4
GO:0005942	phosphoinositide 3-kinase complex	4	4.45249e-06	PIK3CD PIK3CG PIK3R1 PIK3R2
GO:0051716	cellular response to stimulus	16	4.48651e-06	ABL1 ABL1 CCND1 CRKL DDIT3 FOS FOSL1 GSK3B MAPK14 MSH2 MSH3 MSH4 MSH6 PCNA RFC4 RFC5 XRCC5
GO:0051352	negative regulation of ligase activity	7	4.57959e-06	CDC16 PSMB1 PSMB2 PSMB3 PSMB6 PSMB7 PSMC4
GO:0051444	negative regulation of ubiquitin-protein ligase activity	7	4.57959e-06	CDC16 PSMB1 PSMB2 PSMB3 PSMB6 PSMB7 PSMC4
GO:0030880	RNA polymerase complex	5	5.18112e-06	POLR2A POLR2B POLR2F POLR2J POLR2L
GO:0035023	regulation of Rho protein signal transduction	7	5.58722e-06	BCL6 RAC1 SOS1 TIAM1 VAV1 VAV2 VAV3
GO:0030036	actin cytoskeleton organization	11	5.65765e-06	ABL1 ABL1 ACTA1 BCL6 CDC42 CRK HRAS NCK1 NRAS PFN1 RAC1 RALA
GO:0032502	developmental process	53	5.83276e-06	AKT1 ATP5A1 ATP5B BCL6 BRAF BTK CCND1 CD2AP CDC42 CDK6 CEBPB CEBPG CRKL CSE1L DDIT3 FOS FOSL2 FYN GSK3B HCK HLF HRAS JAK2 JUN JUNB LCK LYN MAP2K1 MAPK1 MAPK14 MSH2 NCK1 NFKB2 NRAS ODC1 PAK1 PAK2 PFN1 PIK3R1 PLCG2 PSMC4 PTPN6 RAC1 RASA1 SHB SMARCA4 SRC STXBP1 SYK TGFBR1 VAV3 YY1 ZNRD1
GO:0019222	regulation of metabolic process	56	5.87391e-06	ABL1 ABL1 AKT1 ATF2 ATF3 ATF4 ATF7 BACH1 BATF BCL6 CCNC CCND1 CCND2 CCND3 CCNE1 CDK2 CDK4 CDK6 CEBPB CEBPG CRK DBP DDIT3 EIF4A2 FOS FOSL1 FOSL2 HLF JAK2 JUN JUNB JUND KPNA2 LYN MAPK14 MSH2 MSH3 MSH6 NCK1 NFKB2 PCNA PFN1 PLCG2 POLR2A POLR2K POLR2L PRKCZ RAC1 RAN RASA1 SHC1 SMARCA4 SYK TGFBR1 UBE2D2 YY1 ZNRD1
GO:0006511	ubiquitin-dependent protein catabolic process	11	5.93239e-06	BTRC CD2AP CDC16 CDC2 PSMB1 PSMB2 PSMB3 PSMB6 PSMB7 PSMC4 UBE2D2
GO:0006886	intracellular protein transport	15	6.23709e-06	AKT1 BCL6 CSE1L JAK2 JUN KPNA2 KPNA4 KPNA6 KPNB1 PCNA RAN SEC23A SEC23B SRP54 STX1A
GO:0006996	organelle organization	28	6.25058e-06	ABL1 ABL1 ACTA1 AKT1 BCL6 CD2AP CDC2 CDC42 CDK2 CDK3 CRK HRAS MAP2K1 MSH2 MSH3 MSH4 NCK1 NRAS PAK1 PFN1 PPP5C RAC1 RALA RAN SMARCA4 STXBP1 TUBG1 VAV3 XRCC5
GO:0006974	response to DNA damage stimulus	14	6.27231e-06	ABL1 ABL1 BCL6 CCND1 DDIT3 MAPK1 MAPK14 MSH2 MSH3 MSH4 MSH6 PCNA RFC4 RFC5 XRCC5
GO:0006607	NLS-bearing substrate import into nucleus	4	6.38246e-06	KPNA2 KPNA4 KPNA6 KPNB1
GO:0050852	T cell receptor signaling pathway	4	6.38246e-06	FYN MAPK1 PLCG2 ZAP70
GO:0033554	cellular response to stress	15	6.43769e-06	ABL1 ABL1 CCND1 CRKL DDIT3 FOS GSK3B MAPK14 MSH2 MSH3 MSH4 MSH6 PCNA RFC4 RFC5 XRCC5
GO:0043549	regulation of kinase activity	13	6.55718e-06	AKT1 CCND1 CCND2 CCND3 CDC42 MAP2K1 PAK1 PAK2 RAC1 SHC1 SYK TGFBR1 VAV3
GO:0002253	activation of immune response	7	6.77276e-06	FYN LCK LYN MAPK1 PLCG2 SYK ZAP70
GO:0019899	enzyme binding	15	7.07445e-06	ACTB AKT1 CCND1 CCND2 CCND3 GSK3B LCK LSM2 PIK3R1 POLR2A RAC1 RAP1A RASA1 RFC5 SNRPD3
GO:0009967	positive regulation of signal transduction	12	7.76944e-06	HRAS JAK2 LCK LYN NRAS PPP5C RAC1 SOS1 SRC SYK TGFBR1 ZAP70
GO:0032268	regulation of cellular protein metabolic process	15	8.78354e-06	AKT1 CCND1 CCND2 CCND3 CDK4 EIF4A2 JAK2 JUN LYN NCK1 PRKCZ RAC1 RASA1 SYK TGFBR1
GO:0007010	cytoskeleton organization	14	8.79065e-06	ABL1 ABL1 ACTA1 BCL6 CDC42 CRK HRAS NCK1 NRAS PAK1 PFN1 RAC1 RALA RAN TUBG1
GO:0005665	DNA-directed RNA polymerase II, core complex	4	8.86593e-06	POLR2A POLR2B POLR2J POLR2L
GO:0004693	cyclin-dependent protein kinase activity	5	9.12972e-06	CDC2 CDK2 CDK3 CDK4 CDK6
GO:0003689	DNA clamp loader activity	3	9.62404e-06	RFC2 RFC4 RFC5
GO:0033170	DNA-protein loading ATPase activity	3	9.62404e-06	RFC2 RFC4 RFC5
GO:0043551	regulation of phosphoinositide 3-kinase activity	3	9.62404e-06	CDC42 RAC1 VAV3
GO:0043552	positive regulation of phosphoinositide 3-kinase activity	3	9.62404e-06	CDC42 RAC1 VAV3
GO:0051338	regulation of transferase activity	13	9.80998e-06	AKT1 CCND1 CCND2 CCND3 CDC42 MAP2K1 PAK1 PAK2 RAC1 SHC1 SYK TGFBR1 VAV3
GO:0008380	RNA splicing	12	1.11169e-05	LSM2 LSM3 LSM6 POLR2A POLR2B POLR2C POLR2F POLR2H POLR2J POLR2K POLR2L SNRPD3
GO:0044422	organelle part	69	1.16829e-05	ABL1 ABL1 ACTA1 ACTB AKT1 ATF3 ATF4 ATP5A1 ATP5B CALM1 CCND1 CCNE1 CD2AP CDC16 CDC2 CDK2 CDK4 CSE1L DDX24 FOS HRAS JUN JUNB JUND KPNA2 KPNA4 KPNA6 KPNB1 LCK LSM2 LSM3 LSM6 MAPK1 MAPK14 MAPK3 MSH2 MSH3 MSH4 MSH6 NCK1 NFKB2 NRAS PC PCNA PMPCB POLR2A POLR2B POLR2C POLR2F POLR2H POLR2J POLR2K POLR2L RAB5A RAN RFC2 RFC4 RFC5 SEC23A SEC23B SMARCA4 SNRPD3 SOS1 SRP54 STX1A TUBG1 UQCRC1 XRCC5 YY1 ZNRD1
GO:0050778	positive regulation of immune response	8	1.17537e-05	FYN LCK LYN MAPK1 PLCG2 SH2D1A SYK ZAP70
GO:0030029	actin filament-based process	11	1.2212e-05	ABL1 ABL1 ACTA1 BCL6 CDC42 CRK HRAS NCK1 NRAS PFN1 RAC1 RALA
GO:0051246	regulation of protein metabolic process	16	1.23266e-05	AKT1 CCND1 CCND2 CCND3 CDK4 EIF4A2 JAK2 JUN LYN NCK1 PRKCZ RAC1 RASA1 SYK TGFBR1 UBE2D2
GO:0042221	response to chemical stimulus	23	1.25934e-05	ADH5 AKT1 CALM1 CCND1 DDIT3 DPP4 FOS FOSL1 GSTM3 HRAS JAK2 JUN LCK LYN MAP2K1 MAPK1 MAPK14 PIK3R1 PLCG2 RAC1 RALA SRC SYK
GO:0001934	positive regulation of protein amino acid phosphorylation	7	1.26895e-05	CCND1 CCND2 CCND3 JAK2 LYN SYK TGFBR1
GO:0051301	cell division	12	1.29712e-05	CCND1 CCND2 CCND3 CCNE1 CD2AP CDC16 CDC2 CDK2 CDK3 CDK4 CDK6 RASA1
GO:0042325	regulation of phosphorylation	9	1.4272e-05	CCND1 CCND2 CCND3 JAK2 JUN LYN PRKCZ SYK TGFBR1
GO:0006950	response to stress	30	1.49989e-05	ABL1 ABL1 ADH5 AKT1 ATF4 BCL6 CCND1 CEBPB CEBPG CRKL DDIT3 DPP4 FOS FOSL1 GSK3B ITK MAP2K1 MAPK1 MAPK14 MSH2 MSH3 MSH4 MSH6 PCNA PTPN6 RAC1 RFC4 RFC5 SH2D1A SRC XRCC5
GO:0010647	positive regulation of cell communication	12	1.50907e-05	HRAS JAK2 LCK LYN NRAS PPP5C RAC1 SOS1 SRC SYK TGFBR1 ZAP70
GO:0031323	regulation of cellular metabolic process	53	1.59126e-05	ABL1 ABL1 AKT1 ATF2 ATF3 ATF4 ATF7 BACH1 BATF BCL6 CCNC CCND1 CCND2 CCND3 CCNE1 CDK2 CDK4 CEBPB CEBPG CRK DBP DDIT3 EIF4A2 FOS FOSL1 FOSL2 HLF JAK2 JUN JUNB JUND KPNA2 LYN MAPK14 MSH2 MSH3 MSH6 NCK1 NFKB2 PCNA PFN1 POLR2A POLR2K POLR2L PRKCZ RAC1 RAN RASA1 SHC1 SMARCA4 SYK TGFBR1 YY1 ZNRD1
GO:0005525	GTP binding	14	1.66455e-05	CDC42 EEF1A1 EEF2 HRAS NRAS RAB5A RAC1 RALA RAN RAP1A RAP2A RRAS SRP54 TUBG1
GO:0045595	regulation of cell differentiation	14	1.66455e-05	AKT1 BCL6 CCND1 CDK6 JUNB JUND LCK MAP2K1 MAPK1 MAPK14 PIK3R1 SYK TIAM1 ZAP70
GO:0002684	positive regulation of immune system process	10	1.69428e-05	BCL6 FYN LCK LYN MAPK1 NCK1 PLCG2 SH2D1A SYK ZAP70
GO:0034622	cellular macromolecular complex assembly	14	1.88092e-05	CSE1L KPNB1 NCK1 POLR2A POLR2B POLR2C POLR2F POLR2H POLR2J POLR2K POLR2L RAC1 SRC TUBG1
GO:0005853	eukaryotic translation elongation factor 1 complex	3	1.91063e-05	EEF1A1 EEF1B2 EEF1G
GO:0051095	regulation of helicase activity	3	1.91063e-05	MSH2 MSH3 MSH6
GO:0044446	intracellular organelle part	68	1.92619e-05	ABL1 ABL1 ACTA1 ACTB AKT1 ATF3 ATF4 ATP5A1 ATP5B CALM1 CCND1 CCNE1 CD2AP CDC16 CDC2 CDK2 CDK4 CSE1L DDX24 FOS HRAS JUN JUNB JUND KPNA2 KPNA4 KPNA6 KPNB1 LCK LSM2 LSM3 LSM6 MAPK1 MAPK14 MAPK3 MSH2 MSH3 MSH4 MSH6 NFKB2 NRAS PC PCNA PMPCB POLR2A POLR2B POLR2C POLR2F POLR2H POLR2J POLR2K POLR2L RAB5A RAN RFC2 RFC4 RFC5 SEC23A SEC23B SMARCA4 SNRPD3 SOS1 SRP54 STX1A TUBG1 UQCRC1 XRCC5 YY1 ZNRD1
GO:0031399	regulation of protein modification process	9	1.97888e-05	CCND1 CCND2 CCND3 JAK2 JUN LYN PRKCZ SYK TGFBR1
GO:0006297	nucleotide-excision repair, DNA gap filling	4	2.0592e-05	PCNA RFC2 RFC4 RFC5
GO:0015031	protein transport	20	2.07415e-05	AKT1 BCL6 CSE1L GDI2 JAK2 JUN KPNA2 KPNA4 KPNA6 KPNB1 LCP2 PCNA RAB5A RAN SEC23A SEC23B SNAP23 SRP54 STX1A STXBP1
GO:0002682	regulation of immune system process	13	2.08117e-05	BCL6 CDK6 FYN LCK LYN MAPK1 MAPK14 NCK1 PIK3R1 PLCG2 SH2D1A SYK ZAP70
GO:0019220	regulation of phosphate metabolic process	9	2.0865e-05	CCND1 CCND2 CCND3 JAK2 JUN LYN PRKCZ SYK TGFBR1
GO:0051174	regulation of phosphorus metabolic process	9	2.0865e-05	CCND1 CCND2 CCND3 JAK2 JUN LYN PRKCZ SYK TGFBR1
GO:0019001	guanyl nucleotide binding	14	2.18603e-05	CDC42 EEF1A1 EEF2 HRAS NRAS RAB5A RAC1 RALA RAN RAP1A RAP2A RRAS SRP54 TUBG1
GO:0032561	guanyl ribonucleotide binding	14	2.18603e-05	CDC42 EEF1A1 EEF2 HRAS NRAS RAB5A RAC1 RALA RAN RAP1A RAP2A RRAS SRP54 TUBG1
GO:0045184	establishment of protein localization	20	2.29765e-05	AKT1 BCL6 CSE1L GDI2 JAK2 JUN KPNA2 KPNA4 KPNA6 KPNB1 LCP2 PCNA RAB5A RAN SEC23A SEC23B SNAP23 SRP54 STX1A STXBP1
GO:0003924	GTPase activity	10	2.33511e-05	CDC42 EEF1A1 EEF2 RAB5A RAC1 RAN RAP1A RAP2A RRAS TUBG1
GO:0030183	B cell differentiation	5	2.37773e-05	BCL6 CEBPG MSH2 PIK3R1 PLCG2
GO:0042327	positive regulation of phosphorylation	7	2.41395e-05	CCND1 CCND2 CCND3 JAK2 LYN SYK TGFBR1
GO:0002376	immune system process	21	2.41459e-05	BCL6 CEBPB CEBPG DPP4 FYN LCK LCP2 LYN MAPK1 MSH2 MSH3 MSH6 NCK1 NFKB2 PIK3R1 PLCG2 SH2D1A SHB SYK VAV1 ZAP70
GO:0030154	cell differentiation	23	2.43363e-05	BCL6 CCND1 CDC42 CEBPB CEBPG GSK3B HRAS JAK2 JUN JUNB LCK LYN MAP2K1 MAPK14 MSH2 NFKB2 NRAS PIK3R1 PLCG2 RASA1 SHB SMARCA4 ZNRD1
GO:0042623	ATPase activity, coupled	11	2.76168e-05	ATP5A1 ATP5B DDX18 DDX24 EIF4A1 EIF4A2 RFC2 RFC4 RFC5 SMARCA4 XRCC5
GO:0010562	positive regulation of phosphorus metabolic process	7	2.80479e-05	CCND1 CCND2 CCND3 JAK2 LYN SYK TGFBR1
GO:0045937	positive regulation of phosphate metabolic process	7	2.80479e-05	CCND1 CCND2 CCND3 JAK2 LYN SYK TGFBR1
GO:0046777	protein amino acid autophosphorylation	6	2.89874e-05	AKT1 LCK PAK1 PAK2 SYK ZAP70
GO:0003746	translation elongation factor activity	4	3.30163e-05	EEF1A1 EEF1B2 EEF1G EEF2
GO:0006281	DNA repair	21	3.80559e-05	CD2AB CRKL GRAP2 H3BP2 LCP2 MAPK14 NCK1 PIK3CG PIK3R1 PIK3R2 PLCG1 PLCG2 PTPN6 SHB SHC1 SLA SOS1 TIAM1 VAV1 VAV2 VAV3
